# Supplementary material
Source: PubMed Central journal article supplement (PMC6442024)
Supplement: supp_RA118.005828_140737_1_supp_278408_pm7n6x.pdf [file supp_RA118.005828_140737_1_supp_278408_pm7n6x.pdf]

**Supplementary table 1.** Sequences of the primers used for the generation of CrmD mutants. The substituted bases are underlined.

| Primer | Mutation          | Sequence (5'-3')                                                                        |
|--------|-------------------|-----------------------------------------------------------------------------------------|
| CrmD37 | K44A              | GGTACAGACTATAACAGTAATAATCTATGTTGT <u>G</u> CACAATGCAATCCTGGAAT                          |
| CrmD38 | K44A              | ATTCCAGGATTGCATTGT <u>G</u> CACAACATAGATTATTACTGTTATAGTCTGTACC                          |
| CrmD39 | P68A              | TACAAAATGTGACAAGT <u>G</u> CGCAGATGACACCTTTACATC                                        |
| CrmD40 | P68A              | GATGTAAAGGTGTCATCT <u>G</u> CGCACTGTGCACATTTTGTA                                        |
| CrmD41 | N77A              | AGATGACACCTTTACATCCATT <u>C</u> TCTCATAGTCCCGCGTG                                       |
| CrmD42 | N77A              | CACGCGGGACTATGAG <u>C</u> AGGAATGGATGTAAAGGTGTCATCT                                     |
| CrmD43 | N77F              | AGATGACACCTTTACATCCATT <u>C</u> TTTCATAGTCCCGCGTG                                       |
| CrmD44 | N77F              | CACGCGGGACTATGAA <u>A</u> AGGAATGGATGTAAAGGTGTCATCT                                     |
| CrmD45 | Q93A/E95A         | AAGTTGTCGAGGCAAATGTAGCAGTAAT <u>G</u> CAGTAG <u>C</u> GACTAAATCGTGTAGTAAC               |
| CrmD46 | Q93A/E95A         | GTTACTACACGATTTAGT <u>C</u> GCTACT <u>G</u> CATTACTGCTACATTTGCCTCGACAACCTT              |
| CrmD47 | Q103A/D104A/R105A | GTAATCAAGT <u>F</u> AGAGACTAAATCGTGTAGTAACACAG <u>C</u> GG <u>C</u> CGAGTATGTGCTGTGCATC |
| CrmD48 | Q103A/D104A/R105A | GATGCACAGACACATACT <u>G</u> CG <u>G</u> CGCTGTGTTACTACACGATTTAGTCTCTACTTGATTAC          |
| CrmD49 | Y141A/S142A/S143A | GTGGTCTGGTTACGGTGTATATGGC <u>C</u> CG <u>C</u> AGCTAAAGGAGATGTAATATGTA AAAAGT           |
| CrmD50 | Y141A/S142A/S143A | ACTTTTACATATTACATCTCCTTTAG <u>C</u> TG <u>C</u> GGCGCCATATACACCGTAACCAGAACCAC           |
| CrmD51 | D35A/Y36A         | CCCATTAATGGGAAATGTAACGGTACAG <u>C</u> CGTAACAGTAATAATCTATGTTGTAACAA                     |
| CrmD52 | D35A/Y36A         | TTGTTTACAACATAGATTATTA <u>C</u> TGTTAG <u>C</u> GGCTGTACCGTTACATTTCCCATTAATGGG          |
| CrmD53 | F72A/T73A/S74A    | GACAAGTGCCAGATGACAC <u>C</u> G <u>T</u> G <u>C</u> AGCCATTCCTAATCATAGTCCCG              |
| CrmD54 | F72A/T73A/S74A    | CGGGACTATGATTAGGAATGG <u>C</u> TG <u>C</u> AGGGTGTATCTGGGCACTTGTC                       |
| CrmD55 | H78A/S79A         | CCCAGATGACACCTTTACATCCATTCCTAAT <u>G</u> C <u>T</u> GCTCCCGCGTGTCTAAGT                  |
| CrmD56 | H78A/S79A         | ACTTAGACACGCGGGAG <u>C</u> AG <u>C</u> ATTAGGAATGGATGTAAAGGTGTCATCTGGG                  |
| CrmD57 | R86A/K86A         | TAGTCCCGCGTGTCTAAGTTG <u>T</u> G <u>C</u> AGGGCAGTGTAGCAGTAATCAAGTAGAG                  |
| CrmD58 | R86A/K86A         | CTCTACTTGATTACTGCTACAT <u>G</u> CGCCTG <u>C</u> ACAACCTTAGACACGCGGGACTA                 |
| CrmD59 | S90A/S91A         | GTGTCTAAGTTGTCGAGGCAAATGT <u>G</u> CG <u>C</u> TAATCAAGTAGAGACTAAATCGTGT                |
| CrmD60 | S90A/S91A         | ACACGATTTAGTCTCTACTTGATTAG <u>C</u> GGCAGATTTGCCTCGACAACCTTAGACAC                       |
| CrmD61 | E116A/F117A/E118A | TGCATCCGGATACTACTGCG <u>C</u> AG <u>C</u> TG <u>C</u> AGGATCAAACGGTTGCAGGC              |
| CrmD62 | E116A/F117A/E118A | GCCTGCAACCGTTTGATCCTG <u>C</u> AG <u>C</u> TG <u>C</u> GCAGTAGTATCCGGATGCA              |
| CrmD63 | D146A/I148A       | GTATATGGCTACTCATCTAAAGGAG <u>C</u> TGTAGCATGTAAAAAGTGTCCGGGTAATATA                      |
| CrmD64 | D146A/I148A       | TATATTACCCGGACACTTTTTACAT <u>G</u> C <u>T</u> AC <u>G</u> CTCCTTTAGATGAGTAGCCATATAC     |

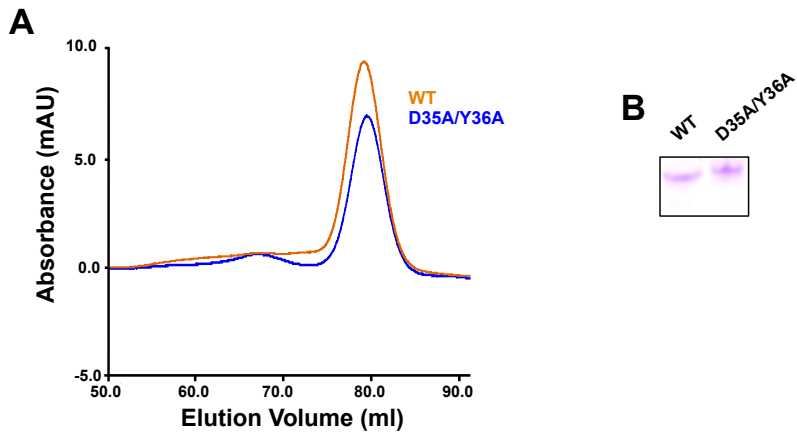

**Figure S1. CrmD D35A/Y36A mutant displays the same oligomeric state than wild type CrmD.** The oligomeric state of wild type CrmD (WT) and the CRD1 mutant D35A/Y36A was compared by size exclusion chromatography (A) and electrophoresis in native gel (B). In A, 100  $\mu$ g of WT (orange) and D35A/Y36A (blue) CrmD mutant in 1 ml of PBS were eluted in a Superdex 200 gel filtration column. In B, 500 ng of WT and D35A/Y36A were analyzed in a native gel using the PhastGel System. Proteins were loaded in a 12.5% homogeneous gel with native buffer strips. Subsequently, the gel was stained with coomassie blue.
